# Supplementary material for: Effect of Semaglutide on Subclinical Atherosclerosis and Cardiometabolic Compensation: A Real-World Study in Patients with Type 2 Diabetes
Source: MDPI journal article supplement (doi:10.3390/biomedicines11051362), 2023-05-04
Supplement: s1 [file s1]

Effect of semaglutide on subclinical atherosclerosis and cardiometabolic compensation: a real-world study in patients with type 2 diabetes

SUPPLEMENTARY MATERIAL

| Supplementary Table S1: Baseline demographics and clinical characteristics of patients stratified according to the disease duration. |                       |                       |                      |
|--------------------------------------------------------------------------------------------------------------------------------------|-----------------------|-----------------------|----------------------|
| Variables                                                                                                                            | Early diabetes (n=12) | Medium diabetes (n=9) | Late diabetes (n=19) |
| Age (years)                                                                                                                          | 61 ± 11               | 66 ± 10               | 69 ± 8               |
| Male                                                                                                                                 | 10 (83)               | 4 (44)                | 12 (63)              |
| Disease duration (years)                                                                                                             | 3 ± 2                 | 11 ± 1                | 23 ± 7               |
| Smoking status:                                                                                                                      |                       |                       |                      |
| • Yes                                                                                                                                | • 7 (58)              | • 2 (22)              | • 4 (21)             |
| • Ex-smoker                                                                                                                          | • 2 (17)              | • 5 (56)              | • 9 (47)             |
| Familiarity with CV diseases                                                                                                         | 8 (67)                | 5 (56)                | 10 (53)              |
| Comorbidities:                                                                                                                       |                       |                       |                      |
| • Hypertension                                                                                                                       | • 10 (83)             | • 9 (100)             | • 15 (79)            |
| • Dyslipidemia                                                                                                                       | • 8 (66)              | • 9 (100)             | • 15 (79)            |
| • Obesity                                                                                                                            | • 9 (75)              | • 6 (67)              | • 13 (68)            |
| • Diabetes complications                                                                                                             | • 2 (16)              | • 2 (22)              | • 7 (37)             |
| Concomitant therapies:                                                                                                               |                       |                       |                      |
| • β-blockers                                                                                                                         | • 3 (25)              | • 4 (44)              | • 11 (58)            |
| • ACE inhibitors                                                                                                                     | • 5 (41)              | • 5 (56)              | • 3 (16)             |
| • Calcium antagonists                                                                                                                | • 3 (25)              | • 3 (33)              | • 5 (26)             |
| • Diuretics                                                                                                                          | • 4 (33)              | • 2 (22)              | • 9 (47)             |
| • AT1R blockers                                                                                                                      | • 5 (41)              | • 4 (44)              | • 11 (58)            |
| Lipid-lowering drugs:                                                                                                                |                       |                       |                      |
| • Statins                                                                                                                            | • 6 (50)              | • 9 (100)             | • 15 (79)            |

**Supplementary Material**

|                                                                                 |                                                                    |                                                                     |                                                                         |
|---------------------------------------------------------------------------------|--------------------------------------------------------------------|---------------------------------------------------------------------|-------------------------------------------------------------------------|
| <ul style="list-style-type: none"> <li>Fibrates</li> <li>Omega-3</li> </ul>     | <ul style="list-style-type: none"> <li>1 (8)</li> <li>–</li> </ul> | <ul style="list-style-type: none"> <li>–</li> <li>3 (33)</li> </ul> | <ul style="list-style-type: none"> <li>1 (5)</li> <li>3 (16)</li> </ul> |
| Aspirin use                                                                     | 7 (58)                                                             | 5 (56)                                                              | 13 (68)                                                                 |
| Data are presented as mean ± SD or n (%).                                       |                                                                    |                                                                     |                                                                         |
| ACE: Angiotensin-converting enzyme; CV: Cardiovascular; SD: Standard deviation. |                                                                    |                                                                     |                                                                         |

| <b>Supplementary Table S2: The effect of 4-month semaglutide therapy on patients with early diabetes (n=12).</b> |                             |                             |                |
|------------------------------------------------------------------------------------------------------------------|-----------------------------|-----------------------------|----------------|
| <b>Variables</b>                                                                                                 | <b>Baseline (mean ± SD)</b> | <b>4 months (mean ± SD)</b> | <b>p-value</b> |
| <b><i>Anthropometric parameters</i></b>                                                                          |                             |                             |                |
| Weight (kg)                                                                                                      | 90 ± 14                     | 84 ± 10                     | 0.006          |
| Waist (cm)                                                                                                       | 102 ± 9                     | 97 ± 7                      | 0.001          |
| BMI (kg/m <sup>2</sup> )                                                                                         | 31 ± 3                      | 29 ± 3                      | 0.003          |
| <b><i>Glycemic parameters</i></b>                                                                                |                             |                             |                |
| Glycemia (mg/dL)                                                                                                 | 170 ± 50                    | 118 ± 25                    | 0.007          |
| HbA1c (%)                                                                                                        | 9±2                         | 7±1                         | <0.001         |
| <b><i>Plasma lipids</i></b>                                                                                      |                             |                             |                |
| Total CHO (mg/dL)                                                                                                | 177 ± 37                    | 158 ± 26                    | 0.024          |
| TG (mg/dL)                                                                                                       | 133 ± 40                    | 129 ± 47                    | 0.808          |
| LDL CHO (mg/dL)                                                                                                  | 109 ± 33                    | 88 ± 22                     | 0.006          |
| HDL CHO (mg/dL)                                                                                                  | 42 ± 8                      | 44 ± 6                      | 0.137          |
| <b><i>Hepatic parameters</i></b>                                                                                 |                             |                             |                |
| Alkaline phosphatase (U/l)                                                                                       | 99 ± 66                     | 77 ± 31                     | 0.074          |
| GGT (UI/L)                                                                                                       | 51 ± 32                     | 41 ± 18                     | 0.067          |
| AST (UI/L)                                                                                                       | 24 ± 10                     | 20 ± 6                      | 0.058          |

**Supplementary Material**

|                                                                                                                                                               |         |           |       |
|---------------------------------------------------------------------------------------------------------------------------------------------------------------|---------|-----------|-------|
| ALT (UI/L)                                                                                                                                                    | 30 ± 19 | 24 ± 11   | 0.054 |
| <b>Carotid IMT</b> (mm)                                                                                                                                       | 1 ± 0.1 | 0.9 ± 0.1 | 0.003 |
| SD: standard deviation; TG: triglycerides; CHO: cholesterol; AST: aspartate aminotransferase; ALT: alanine aminotransferase; GGT: gamma-glutamyl transferase. |         |           |       |

| <b>Supplementary Table S3. The effect of 4-month semaglutide therapy on patients with medium diabetes (n=9).</b>                                              |                             |                             |                |
|---------------------------------------------------------------------------------------------------------------------------------------------------------------|-----------------------------|-----------------------------|----------------|
| <b>Variables</b>                                                                                                                                              | <b>Baseline (mean ± SD)</b> | <b>4 months (mean ± SD)</b> | <b>p-value</b> |
| <b><i>Anthropometric parameters</i></b>                                                                                                                       |                             |                             |                |
| Weight (kg)                                                                                                                                                   | 84 ± 17                     | 81 ± 17                     | 0.009          |
| Waist (cm)                                                                                                                                                    | 98 ± 11                     | 94 ± 11                     | 0.024          |
| BMI (kg/m <sup>2</sup> )                                                                                                                                      | 31 ± 8                      | 30 ± 8                      | 0.008          |
| <b><i>Glycemic parameters</i></b>                                                                                                                             |                             |                             |                |
| Glycemia (mg/dL)                                                                                                                                              | 177 ± 115                   | 121 ± 16                    | 0.133          |
| HbA1c (%)                                                                                                                                                     | 9±3                         | 7±1                         | 0.009          |
| <b><i>Plasma lipids</i></b>                                                                                                                                   |                             |                             |                |
| Total CHO (mg/dL)                                                                                                                                             | 187 ± 60                    | 152 ± 23                    | 0.122          |
| TG (mg/dL)                                                                                                                                                    | 191 ± 122                   | 131 ± 39                    | 0.101          |
| LDL CHO (mg/dL)                                                                                                                                               | 108 ± 54                    | 82 ± 21                     | 0.183          |
| HDL CHO (mg/dL)                                                                                                                                               | 46 ± 14                     | 46 ± 12                     | 0.728          |
| <b><i>Hepatic parameters</i></b>                                                                                                                              |                             |                             |                |
| Alkaline phosphatase (U/l)                                                                                                                                    | 70 ± 42                     | 59 ± 24                     | 0.195          |
| GGT (UI/L)                                                                                                                                                    | 38 ± 20                     | 34 ± 18                     | 0.054          |
| AST (UI/L)                                                                                                                                                    | 25 ± 22                     | 22 ± 12                     | 0.418          |
| ALT (UI/L)                                                                                                                                                    | 30 ± 27                     | 24 ± 15                     | 0.190          |
| <b>Carotid IMT</b>                                                                                                                                            | 1 ± 0.2                     | 0.9 ± 0.2                   | <0.001         |
| SD: standard deviation; TG: triglycerides; CHO: cholesterol; AST: aspartate aminotransferase; ALT: alanine aminotransferase; GGT: gamma-glutamyl transferase. |                             |                             |                |

| Supplementary Table S4. The effect of 4-month semaglutide therapy on patients with late diabetes (n=19).                                                      |                          |                          |         |
|---------------------------------------------------------------------------------------------------------------------------------------------------------------|--------------------------|--------------------------|---------|
| Variables                                                                                                                                                     | Baseline (mean $\pm$ SD) | 4 months (mean $\pm$ SD) | p-value |
| <b><i>Anthropometric parameters</i></b>                                                                                                                       |                          |                          |         |
| Weight (kg)                                                                                                                                                   | 89 $\pm$ 18              | 83 $\pm$ 15              | <0.001  |
| Waist (cm)                                                                                                                                                    | 102 $\pm$ 12             | 98 $\pm$ 11              | 0.002   |
| BMI (kg/m <sup>2</sup> )                                                                                                                                      | 33 $\pm$ 4               | 30 $\pm$ 4               | <0.001  |
| <b><i>Glycemic parameters</i></b>                                                                                                                             |                          |                          |         |
| Glycemia (mg/dL)                                                                                                                                              | 179 $\pm$ 68             | 124 $\pm$ 23             | <0.001  |
| HbA1c (%)                                                                                                                                                     | 9 $\pm$ 2                | 7 $\pm$ 0.7              | <0.001  |
| <b><i>Plasma lipids</i></b>                                                                                                                                   |                          |                          |         |
| Total CHO (mg/dL)                                                                                                                                             | 176 $\pm$ 37             | 155 $\pm$ 34             | <0.001  |
| TG (mg/dL)                                                                                                                                                    | 155 $\pm$ 94             | 131 $\pm$ 47             | 0.086   |
| LDL CHO (mg/dL)                                                                                                                                               | 104 $\pm$ 40             | 89 $\pm$ 35              | 0.004   |
| HDL CHO (mg/dL)                                                                                                                                               | 41 $\pm$ 11              | 39 $\pm$ 8               | 0.300   |
| <b><i>Hepatic parameters</i></b>                                                                                                                              |                          |                          |         |
| Alkaline phosphatase (U/l)                                                                                                                                    | 69 $\pm$ 22              | 63 $\pm$ 21              | 0.013   |
| GGT (UI/L)                                                                                                                                                    | 31 $\pm$ 17              | 29 $\pm$ 14              | 0.347   |
| AST (UI/L)                                                                                                                                                    | 19 $\pm$ 6               | 19 $\pm$ 5               | 0.777   |
| ALT (UI/L)                                                                                                                                                    | 27 $\pm$ 13              | 24 $\pm$ 10              | 0.015   |
| <b><i>Carotid IMT</i></b>                                                                                                                                     | 1 $\pm$ 0.1              | 0.9 $\pm$ 0.08           | <0.001  |
| SD: standard deviation; TG: triglycerides; CHO: cholesterol; AST: aspartate aminotransferase; ALT: alanine aminotransferase; GGT: gamma-glutamyl transferase. |                          |                          |         |

| Supplementary Table S5: Anthropometric, glycemic, hepatic parameters and plasma lipids variation according to diabetes duration                               |                       |                       |                      |         |
|---------------------------------------------------------------------------------------------------------------------------------------------------------------|-----------------------|-----------------------|----------------------|---------|
| Variables                                                                                                                                                     | Delta                 |                       |                      | p-value |
|                                                                                                                                                               | Early diabetes (n=12) | Medium diabetes (n=9) | Late diabetes (n=19) |         |
| <b>Anthropometric parameters</b>                                                                                                                              |                       |                       |                      |         |
| Weight (kg)                                                                                                                                                   | -5.5 (5.5)            | -3.5 (3.1)            | -5.9 (5.0)           | 0.472   |
| Waist (cm)                                                                                                                                                    | -4.7 (3.2)            | -3.3 (3.6)            | -3.3 (4.0)           | 0.603   |
| BMI (kg/m²)                                                                                                                                                   | -1.8 (1.6)            | -1.2 (1.1)            | -2.3 (2.1)           | 0.351   |
| <b>Glycemic parameters</b>                                                                                                                                    |                       |                       |                      |         |
| Glycemia (mg/dL)                                                                                                                                              | -52 (54)              | -56 (100)             | -55 (57)             | 0.986   |
| <b>Plasma lipids</b>                                                                                                                                          |                       |                       |                      |         |
| Total CHO (mg/dL)                                                                                                                                             | -19 (25)              | -34 (59)              | -21 (21)             | 0.548   |
| TG (mg/dL)                                                                                                                                                    | -4 (53)               | -60 (98)              | -24 (58)             | 0.175   |
| LDL CHO (mg/dL)                                                                                                                                               | -21 (22)              | -26 (50)              | -14 (19)             | 0.600   |
| HDL CHO (mg/dL)                                                                                                                                               | +3.1 (6.7)            | +0.7 (5.5)            | -1.8 (7.5)           | 0.163   |
| <b>Hepatic parameters</b>                                                                                                                                     |                       |                       |                      |         |
| Alkaline phosphatase (U/l)                                                                                                                                    | -22.0 (38)            | -10.8 (22.8)          | -6.5 (7.5)           | 0.243   |
| GGT (UI/L)                                                                                                                                                    | -9.7 (16.5)           | -4.4 (5.9)            | -1.9 (8.6)           | 0.179   |
| AST (UI/L)                                                                                                                                                    | -4.0 (6.6)            | -3.2 (11.3)           | -0.2 (3.2)           | 0.273   |
| ALT (UI/L)                                                                                                                                                    | -5.4 (8.7)            | -6.3 (13.3)           | -3.1 (5.0)           | 0.594   |
| SD: standard deviation; TG: triglycerides; CHO: cholesterol; AST: aspartate aminotransferase; ALT: alanine aminotransferase; GGT: gamma-glutamyl transferase. |                       |                       |                      |         |

| Supplementary Table S6: Correlation between hepatic steatosis markers (FLI, HSI), hepatic fibrosis markers (AST/ALT ratio, BARD score) and triglyceride glucose (TyG) index and changes in cIMT and HbA1c    |                          |         |                           |              |
|--------------------------------------------------------------------------------------------------------------------------------------------------------------------------------------------------------------|--------------------------|---------|---------------------------|--------------|
| Univariate analysis of variance                                                                                                                                                                              | Dependent variable: cIMT |         | Dependent variable: HbA1c |              |
|                                                                                                                                                                                                              | F                        | p-value | F                         | p-value      |
| FLI                                                                                                                                                                                                          | 0.838                    | 0.367   | 2.426                     | 0.129        |
| HSI                                                                                                                                                                                                          | 2.161                    | 0.151   | 0.817                     | 0.373        |
| AST/ALT ratio                                                                                                                                                                                                | 0.958                    | 0.335   | 1.274                     | 0.267        |
| BARD score                                                                                                                                                                                                   | 0.162                    | 0.690   | 0.052                     | 0.821        |
| TyG index                                                                                                                                                                                                    | 0.000                    | 0.985   | 4.187                     | <b>0.049</b> |
| cIMT: carotid intima-media thickness; HbA1c: hemoglobin A1c; FLI: Fatty Liver Index; HSI: Hepatic Steatosis Index; TyG: triglyceride-glucose index. Bold values represent statistically significant p-value. |                          |         |                           |              |

| Supplementary Table S7: Correlation between anthropometric, glycemic, hepatic parameters and plasma lipids and changes in cIMT and HbA1c.                                                          |                          |         |                           |         |
|----------------------------------------------------------------------------------------------------------------------------------------------------------------------------------------------------|--------------------------|---------|---------------------------|---------|
| Univariate analysis of variance                                                                                                                                                                    | Dependent variable: cIMT |         | Dependent variable: HbA1c |         |
|                                                                                                                                                                                                    | F                        | p-value | F                         | p-value |
| Total CHO                                                                                                                                                                                          | 0.784                    | 0.382   | 1.638                     | 0.209   |
| TG                                                                                                                                                                                                 | 0.927                    | 0.324   | 2.053                     | 0.161   |
| LDL CHO                                                                                                                                                                                            | 0.315                    | 0.578   | 1.545                     | 0.222   |
| Alkaline phosphatase                                                                                                                                                                               | 0.085                    | 0.73    | 0.821                     | 0.371   |
| GGT                                                                                                                                                                                                | 0.937                    | 0.340   | 0.571                     | 0.455   |
| AST                                                                                                                                                                                                | 0.100                    | 0.754   | 0.889                     | 0.352   |
| ALT                                                                                                                                                                                                | 0.001                    | 0.969   | 0.071                     | 0.792   |
| cIMT: carotid intima-media thickness; HbA1c: hemoglobin A1c; TG: triglycerides; CHO: cholesterol; GGT: gamma-glutamyl transferase; AST: aspartate aminotransferase; ALT: alanine aminotransferase; |                          |         |                           |         |
